# Supplementary material for: Coupling PtZn intermetallic and atomically dispersed cobalt towards efficient and stable oxygen reduction reaction catalysts
Source: Royal Society of Chemistry journal article supplement (doi:10.1039/d3ta04591a), 2023-01-01
Supplement: d3ta04591a1.pdf [file d3ta04591a1.pdf]

## Supporting information

# Coupling PtZn intermetallic and atomically dispersed cobalt towards efficient and stable oxygen reduction reaction catalysts

Lei Zhao <sup>a</sup>, Xueqiang Qi <sup>b,c,\*</sup>, Tingting Yang <sup>c</sup>, Pei Xiong <sup>a</sup>, Xiaobin Niu <sup>a</sup>, Jinxia Jiang <sup>d</sup>, Qian Xue <sup>e</sup>, Le Yu <sup>e</sup>, Jun Song Chen <sup>a,f,g</sup>, Andreu Cabot <sup>b,h,\*</sup>, and Rui Wu <sup>a,\*</sup>

<sup>a</sup> School of Materials and Energy, University of Electronic Science and Technology of China, Chengdu 611731, China.

<sup>b</sup> Catalonia Institute for Energy Research (IREC), Sant Adrià de Besòs, Barcelona 08930, Spain.

<sup>c</sup> College of Chemistry and Chemical Engineering, Chongqing University of Technology, Chongqing 400054, China.

<sup>d</sup> Chongqing Medical and Pharmaceutical College, Chongqing, 400020, China

<sup>e</sup> State Key Lab of Organic-Inorganic Composites, Beijing University of Chemical Technology, Beijing 100029, China.

<sup>f</sup> Interdisciplinary Materials Research Center, Institute for Advanced Study, Chengdu University, Chengdu 610106, China

<sup>g</sup> Shenzhen Institute for Advanced Study, University of Electronic Science and Technology of China, Shenzhen 518000, China.

<sup>h</sup> ICREA, Pg. Lluís Companys 23, Barcelona 08010, Catalonia, Spain

\* Corresponding Authors

Xueqiang Qi, Email: xqqi@cqut.edu.cn; Andreu Cabot, Email: acabot@irec.cat; Rui Wu,

Email: [ruiwu0904@uestc.edu.cn](mailto:ruiwu0904@uestc.edu.cn)

## Computational details

Spin-polarized DFT calculations were performed with the Vienna Ab initio Simulation Package (VASP).<sup>1,2</sup> The Perdew-Burke-Ernzerhof (PBE) functional within the generalized gradient approximation (GGA) was adopted to describe electronic exchange-correlation energy.<sup>3</sup> The ionic cores were described with the projector augmented wave (PAW) method. In all the calculations, the vacuum was established at 15 Å to create a true crystal surface. A cutoff energy of 400 eV was provided and a 3×3×1 Monkhorst Pack k-point sampling was chosen for the well-converged energy values. Geometry optimizations were pursued until the force on each atom falls below the convergence criterion of 0.02 eV/Å and energies converged within 10<sup>-5</sup> eV.

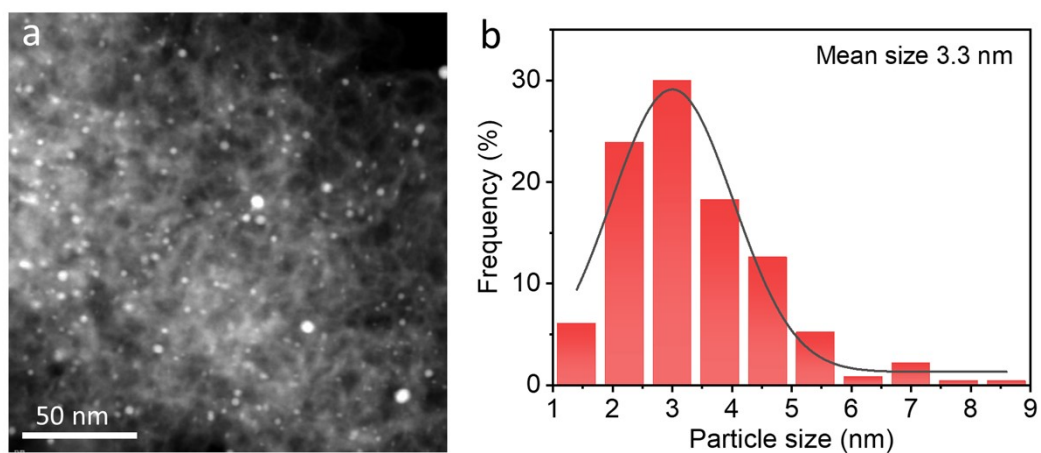

**Fig. S1** (a) TEM image of PtZn-NC and (b) corresponding size distribution histogram of PtZn NPs.

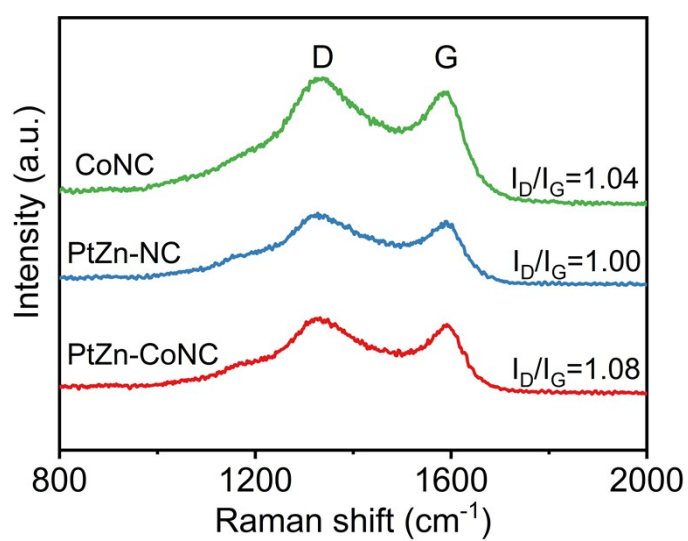

**Fig. S2** Raman spectra of PtZn-CoNC, PtZn-NC and CoNC.

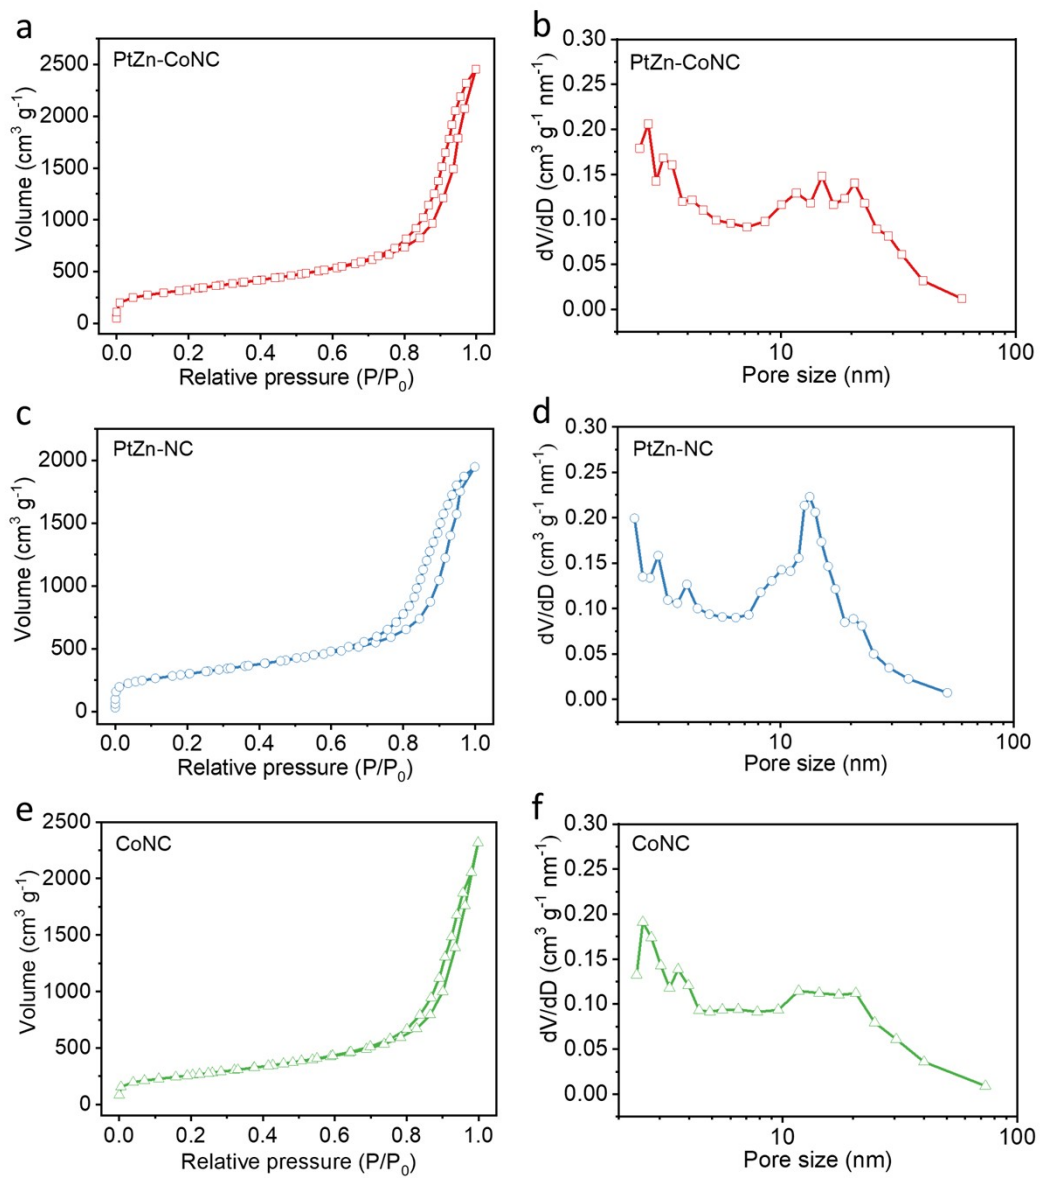

**Fig. S3** N<sub>2</sub> adsorption/desorption isotherms and pore size distribution plots of (a, b) PtZn-CoNC, (c, d) PtZn-NC and (e, f) CoNC.

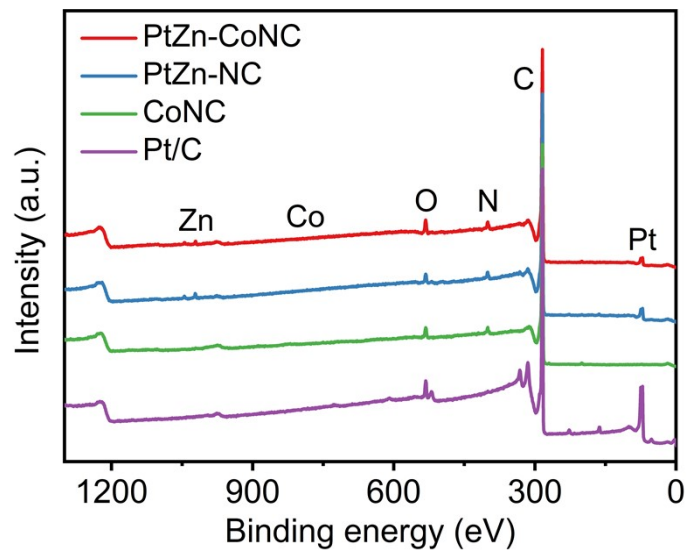

**Fig. S4** XPS survey spectra of PtZn-CoNC, PtZn-NC, CoNC and Pt/C.

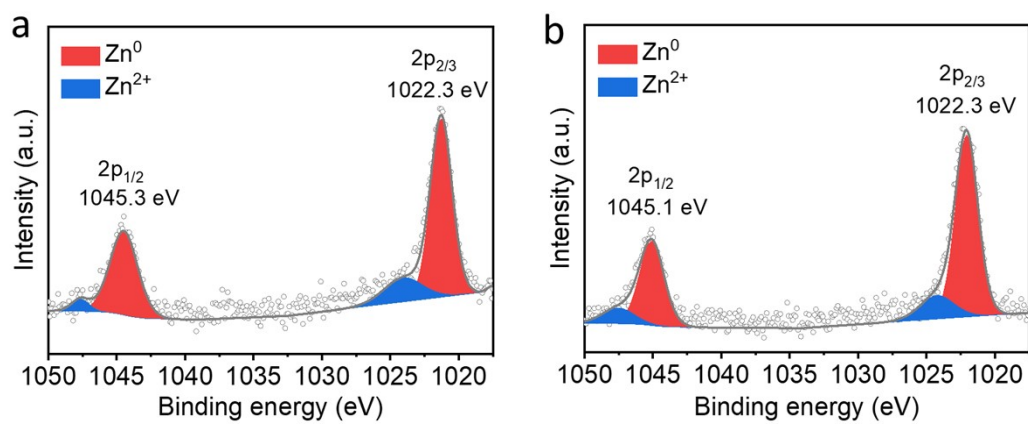

**Fig. S5** Zn 2p XPS spectra of (a) PtZn-CoNC and (b) PtZn-NC.

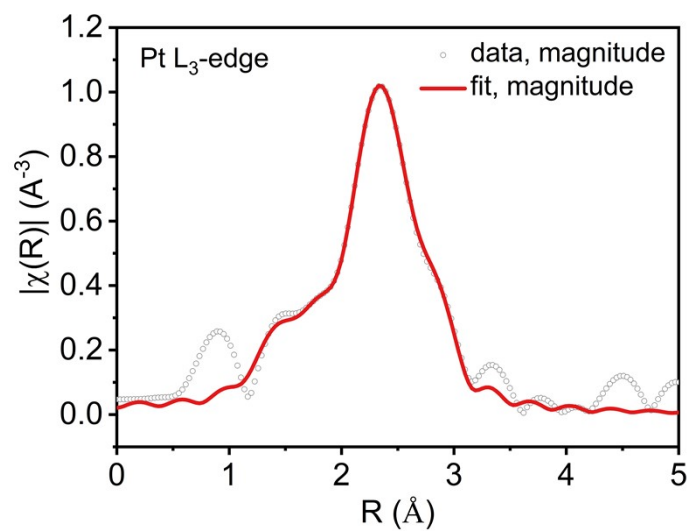

**Fig. S6** Fitted Pt EXAFS spectrum of PtZn-CoNC.

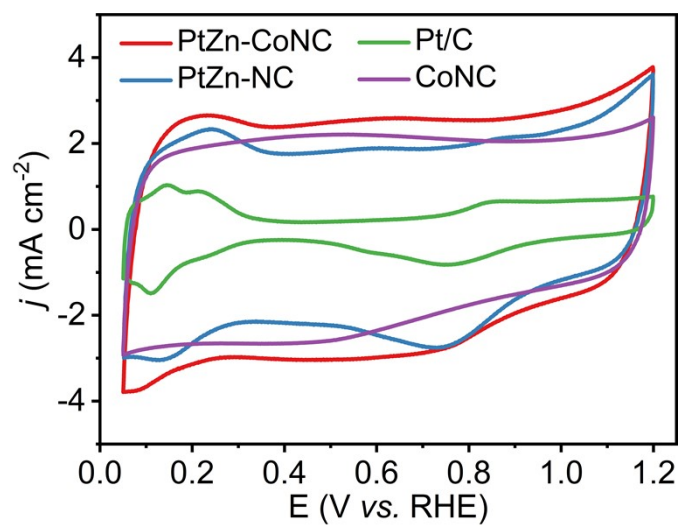

**Fig. S7** CV curves for PtZn-CoNC, PtZn-NC and commercial Pt/C catalysts.

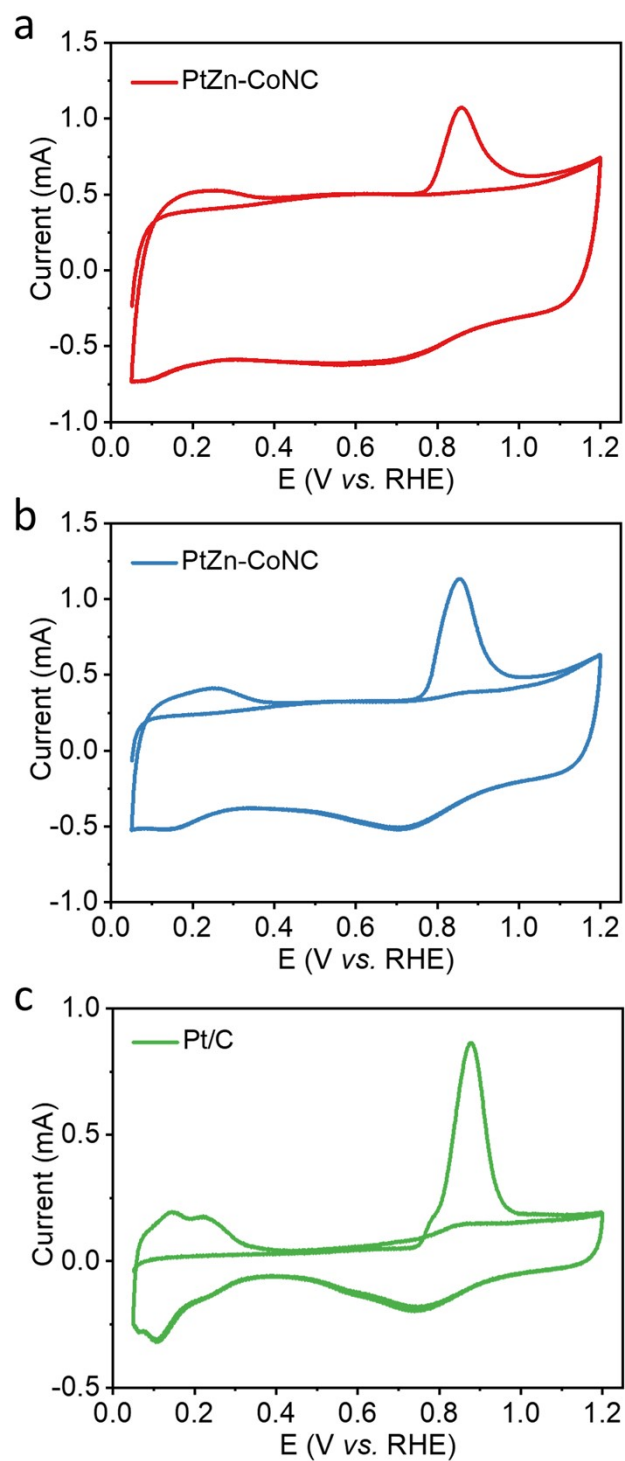

**Fig. S8** CO stripping voltammograms of (a) PtZn-CoNC, (b) PtZn-NC and (c) Pt/C.



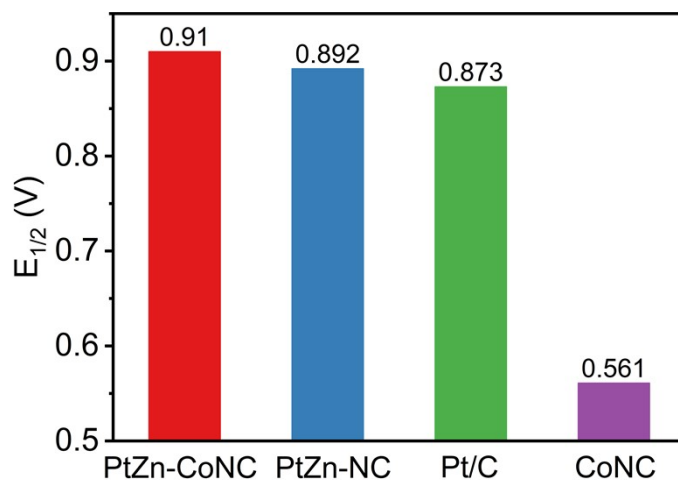

**Fig. S9** Half-wave potentials for PtZn-CoNC, PtZn-NC and Pt/C.

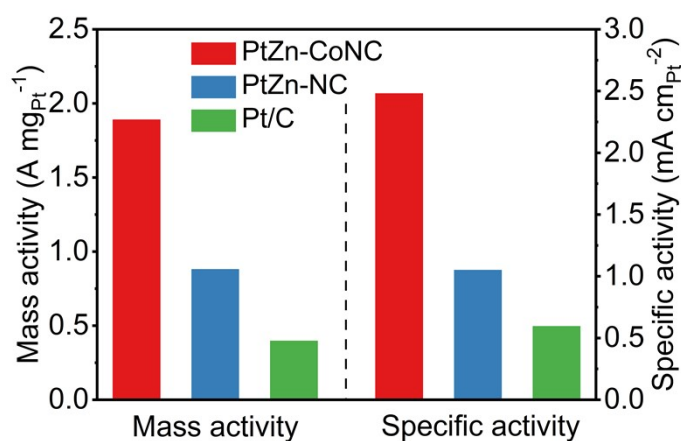

**Fig. S10** Mass activities and specific activities for PtZn-CoNC, PtZn-NC and Pt/C at 0.85 V vs. RHE.

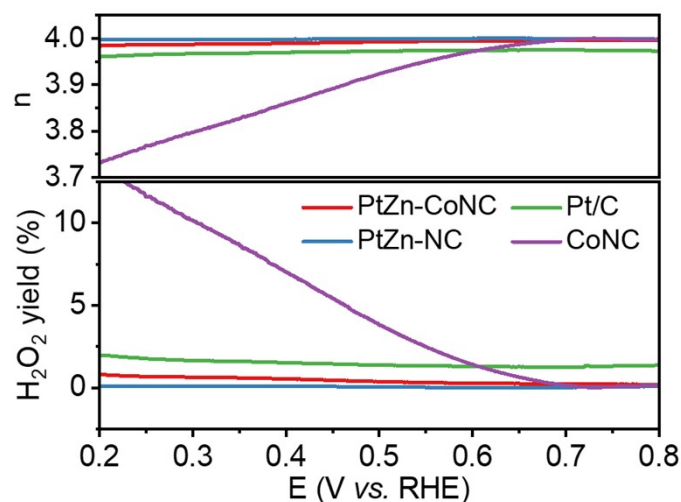

**Fig. S11** Electron transfer number and  $H_2O_2$  yield for PtZn-CoNC, PtZn-NC, Pt/C and CoNC obtained from RRDE measurements.

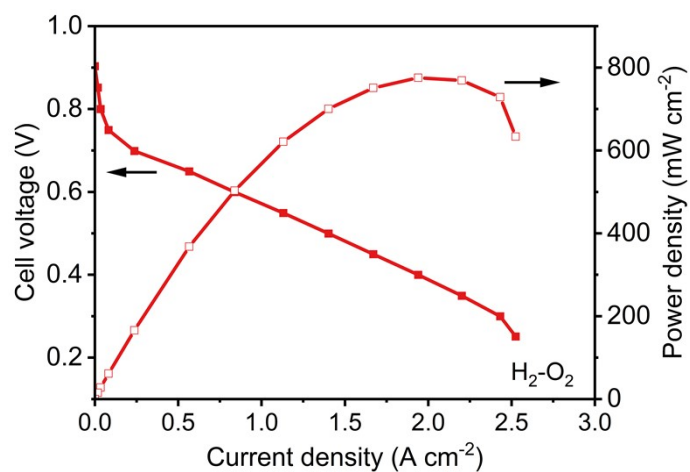

**Fig. S12** Polarization and power density curves of H<sub>2</sub>-O<sub>2</sub> fuel cells based on PtZn-CoNC and commercial Pt/C cathode catalysts with a cathode Pt loading of 0.05 mg cm<sub>Pt</sub><sup>-2</sup>.

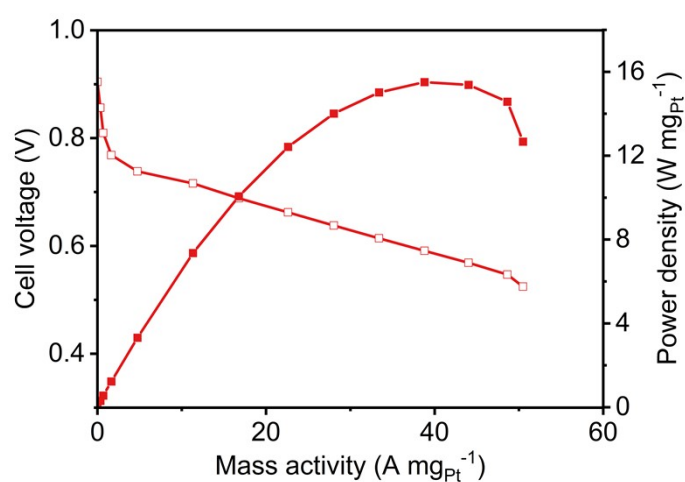

**Fig. S13** Mass normalized H<sub>2</sub>-O<sub>2</sub> fuel cell performance of PtZn-CoNC.

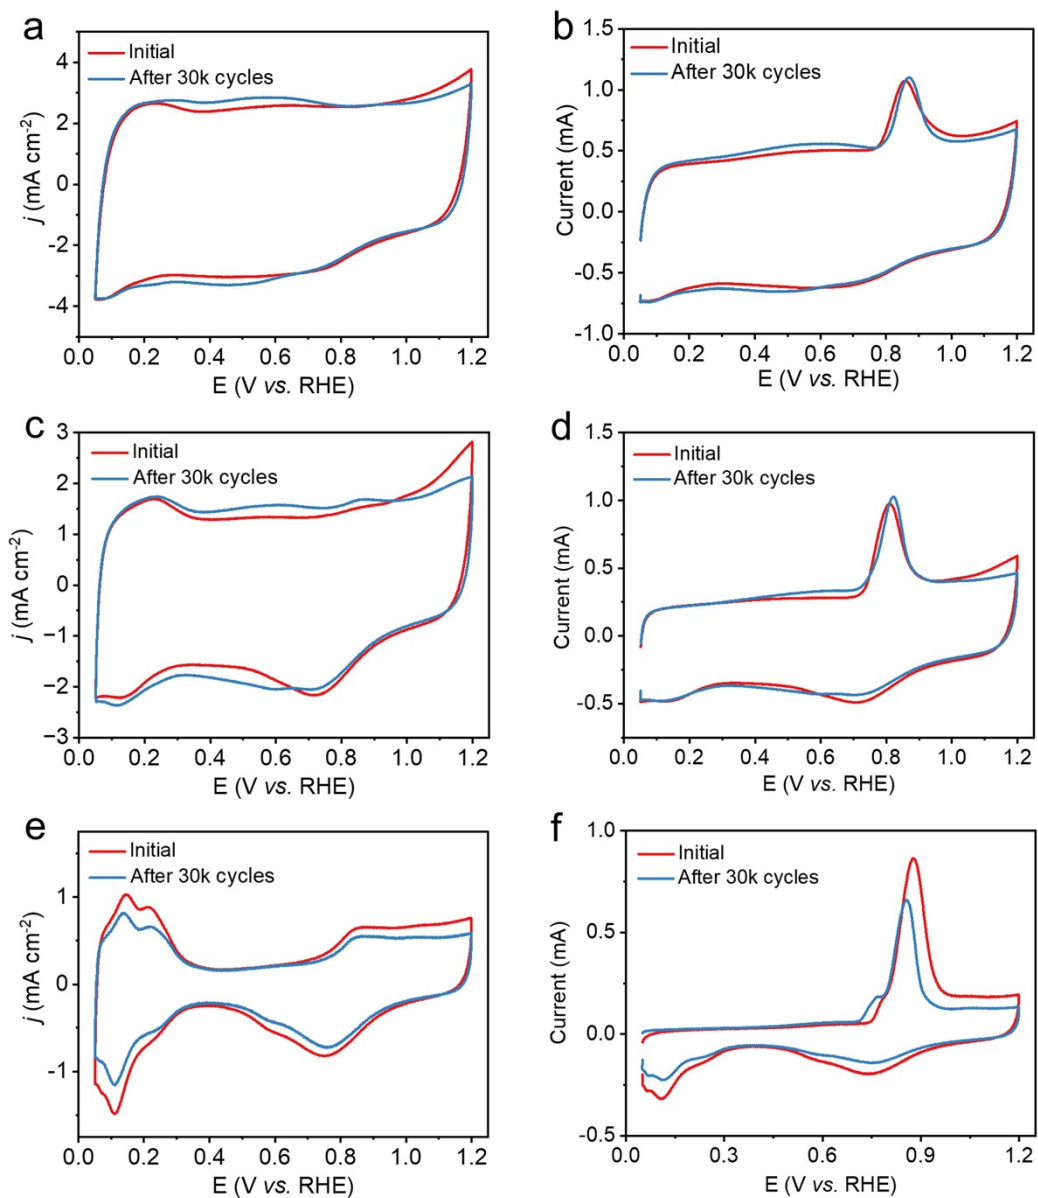

**Fig. S14** CV curves and CO stripping voltammograms before and after 30,000 cycles of (a, b) PtZn-CoNC, (c, d) PtZn-NC and (e, f) Pt/C.

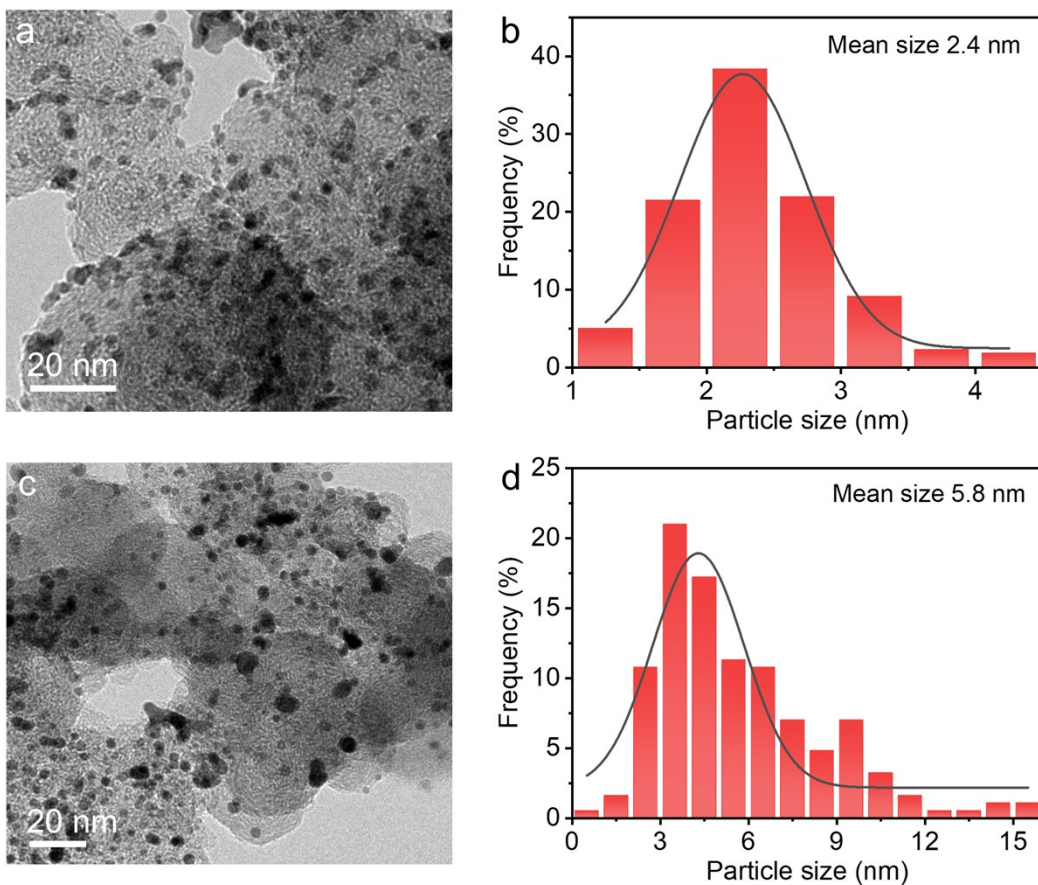

**Fig. S15** TEM images and corresponding Pt size distributions of (a, b) fresh Pt/C catalyst and (c, d) aged Pt/C catalyst after 30,000 cycles.

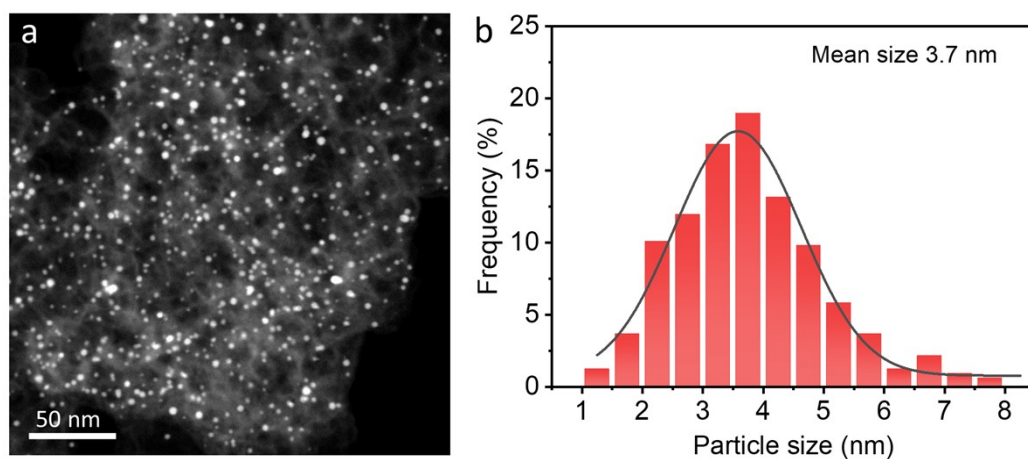

**Fig. S16** (a) TEM image and (b) corresponding PtZn particle size distribution of PtZn-NC after 30,000 potential cycles.

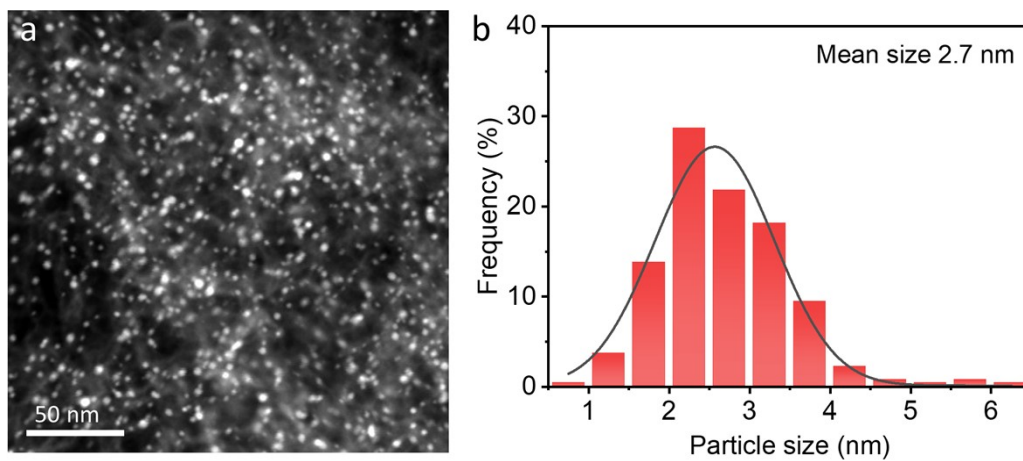

**Fig. S17** (a) TEM image and (b) corresponding PtZn particle size distribution of PtZn-CoNC after 30,000 potential cycles.

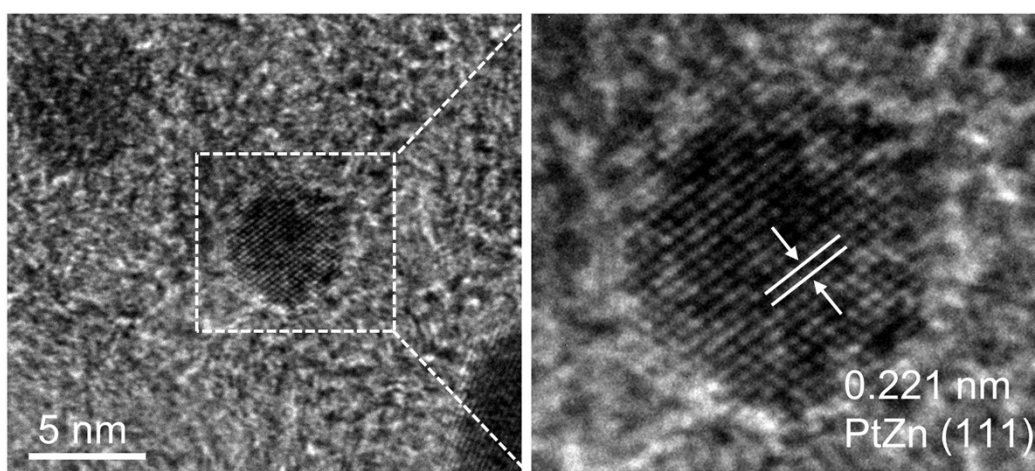

**Fig. S18** HR-TEM images of PtZn-CoNC after 30,000 potential cycles.



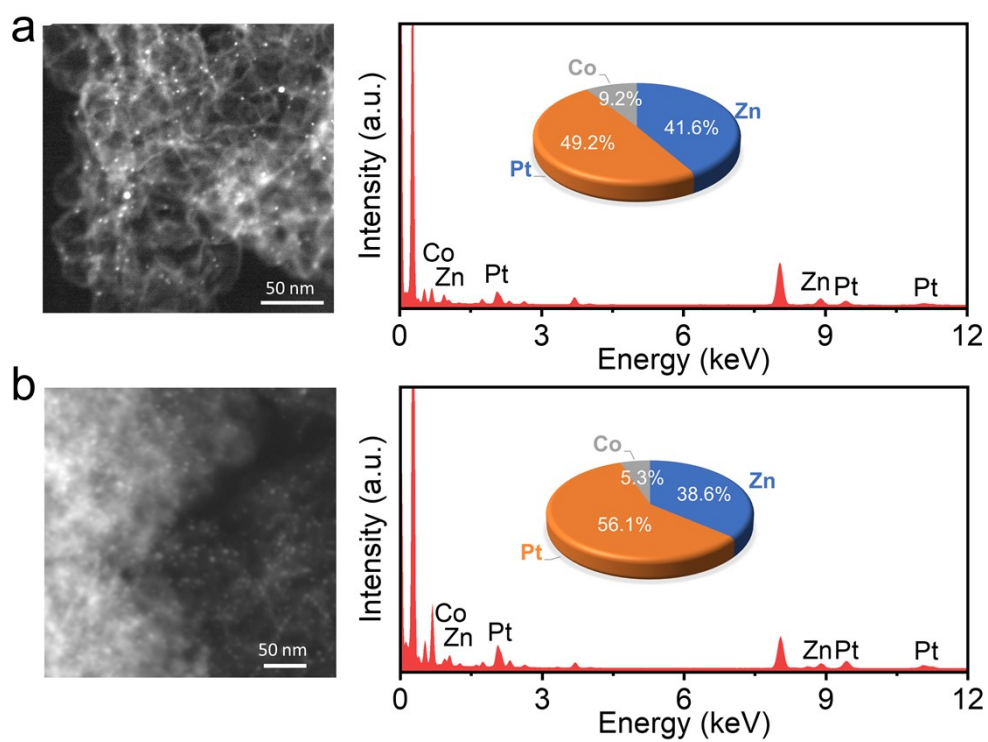

**Fig. S19** TEM images and corresponding EDS analysis of PtZn-CoNC: (a) initial and (b) after the 30k cycles.

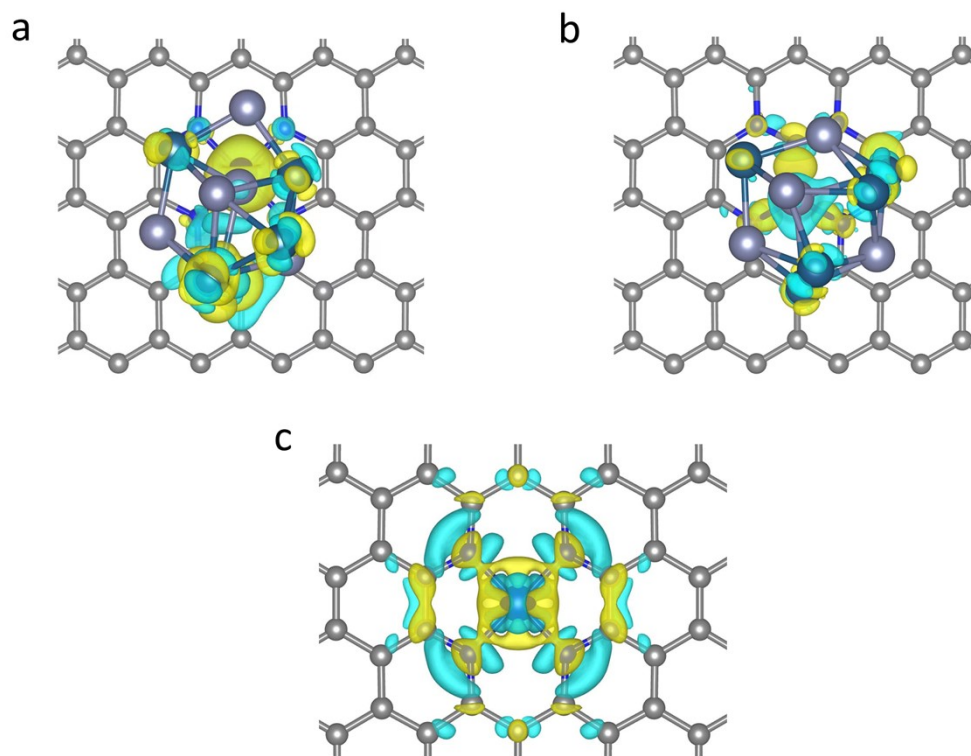

**Fig. S20** Differential charge diagrams of (a) PtZn/CoN<sub>4</sub>, (b) PtZn/NC and (c) CoN<sub>4</sub> at top view.

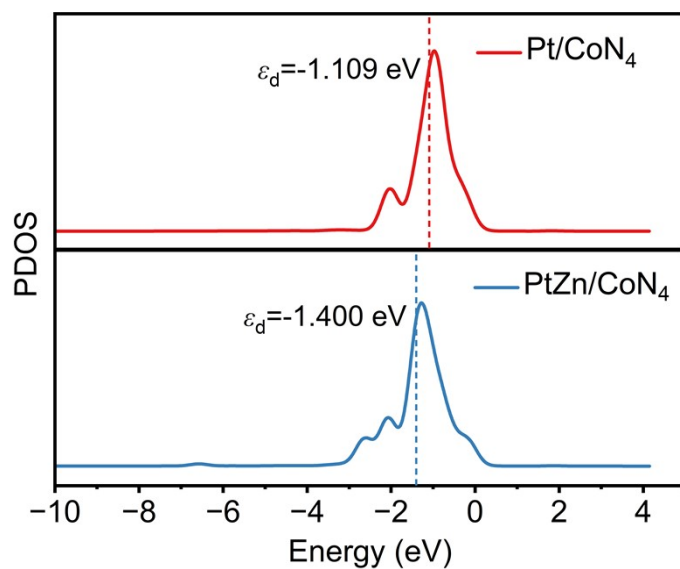

**Fig. S21** Projected density of states (PDOS) diagrams of Pt in Pt/CoN<sub>4</sub> and PtZn/CoN<sub>4</sub>.

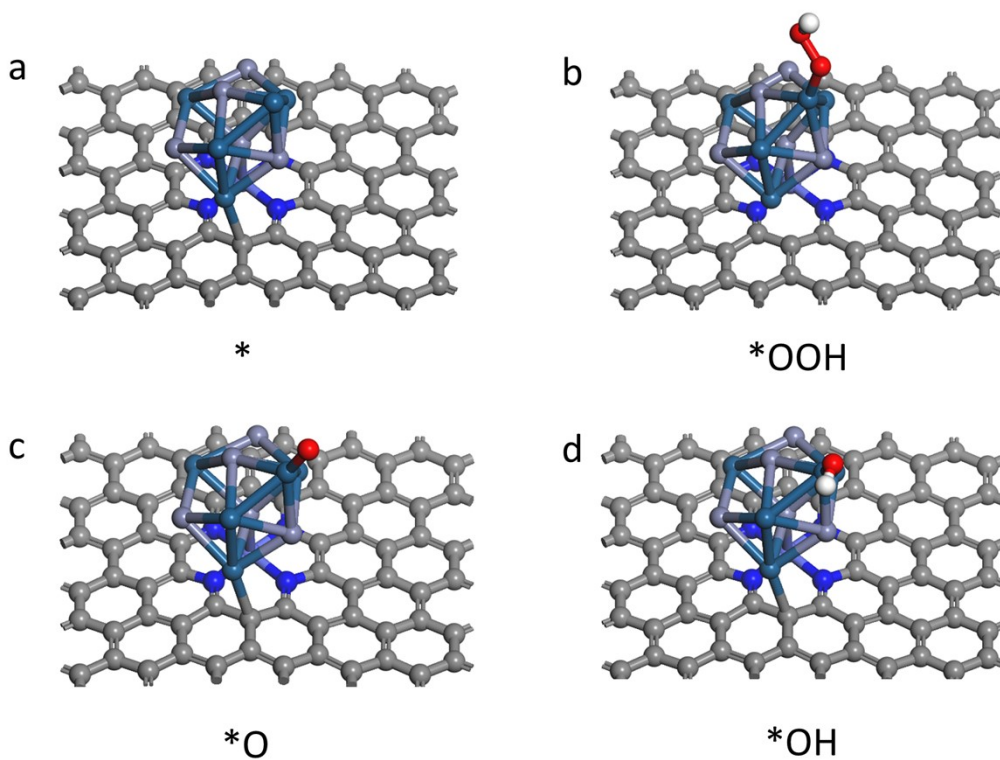

**Fig. S22** Configurations of the adsorbed intermediates on PtZn/CoN<sub>4</sub>: (a) bare surface (b) \*OOH, (c) \*O, and (d) \*OH.

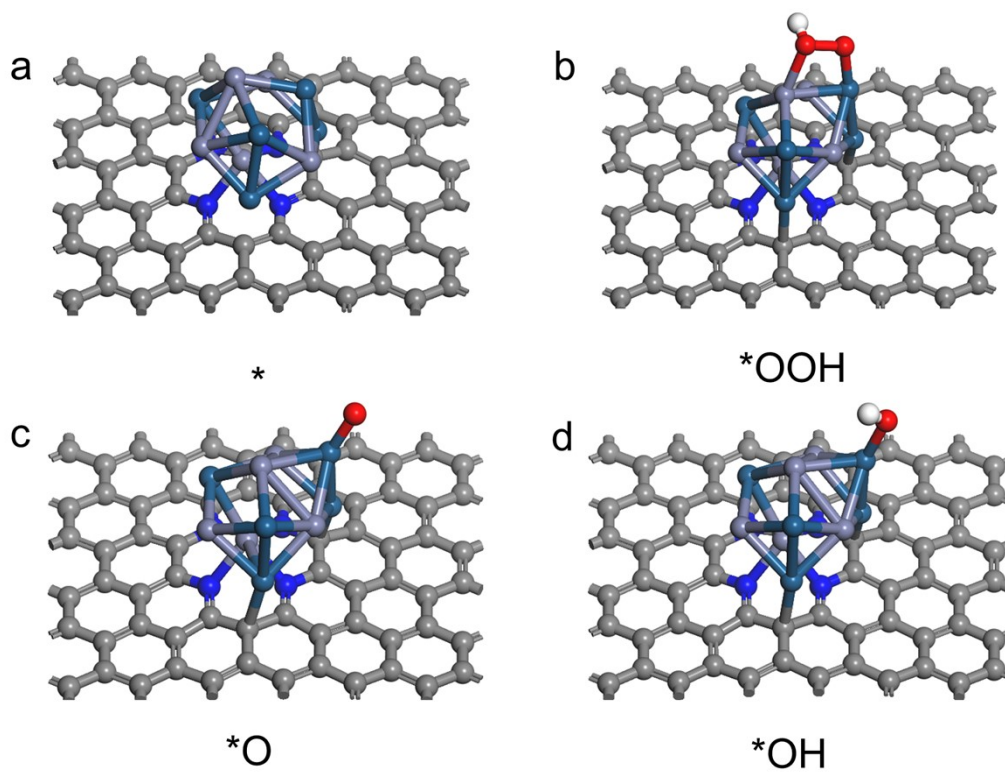

**Fig. S23** Configurations of the adsorbed intermediates on PtZn/NC: (a) bare surface (b)  $*OOH$ , (c)  $*O$ , and (d)  $*OH$ .

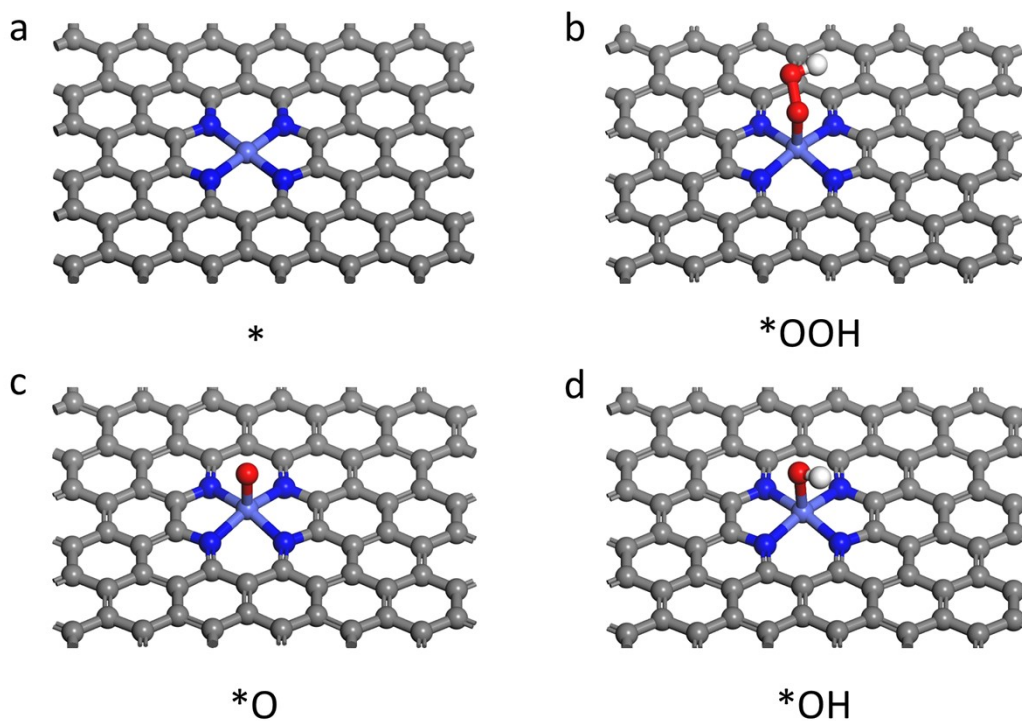

**Fig. S24** Configurations of the adsorbed intermediates on CoN<sub>4</sub>: (a) bare surface (b)  $*OOH$ , (c)  $*O$ , and (d)  $*OH$ .



**Table S1** Pore parameters for PtZn-CoNC, PtZn-NC and CoNC.

| Sample                                               | PtZn-CoNC | PtZn-NC | CoNC  |
|------------------------------------------------------|-----------|---------|-------|
| BET (m <sup>2</sup> g <sup>-1</sup> )                | 1157.6    | 1054.2  | 920.8 |
| Average pore size (nm)                               | 6.94      | 5.83    | 7.79  |
| Total pore volume (cm <sup>3</sup> g <sup>-1</sup> ) | 4.05      | 5.72    | 3.58  |

**Table S2** Elemental composition determined by XPS for different samples.

|           | C / at% | N / at% | Pt / at% | Zn / at% | Co / at% |
|-----------|---------|---------|----------|----------|----------|
| PtZn-CoNC | 93.39   | 5.64    | 0.46     | 0.34     | 0.18     |
| PtZn-NC   | 95.09   | 4.22    | 0.43     | 0.26     | --       |
| CoNC      | 93.99   | 5.89    | --       | --       | 0.12     |
| Pt/C      | 99.16   | --      | 0.84     | --       | --       |

**Table S3.** The bind energies of individual peak deconvolution of Pt 4f spectra and corresponding relative concentration of Pt species in PtZn-CoNC, PtZn-NC and Pt/C samples.

| Sample    | Pt 4f <sub>7/2</sub> |         |                  |         | Pt 4f <sub>5/2</sub> |         |                  |         |
|-----------|----------------------|---------|------------------|---------|----------------------|---------|------------------|---------|
|           | Pt <sup>0</sup>      |         | Pt <sup>2+</sup> |         | Pt <sup>0</sup>      |         | Pt <sup>2+</sup> |         |
|           | Binding energy       | Content | Binding energy   | content | Binding energy       | content | Binding energy   | content |
| PtZn-CoNC | 71.4 eV              | 30.5%   | 72.5 eV          | 19.7 %  | 74.9 eV              | 30.5%   | 76.0 eV          | 20.8%   |
| PtZn-NC   | 71.5 eV              | 29.9%   | 72.6 eV          | 18.7%   | 75.0 eV              | 32.0%   | 76.2 eV          | 18.7%   |
| Pt/C      | 71.9 eV              | 25.2%   | 72.8 eV          | 26.0%   | 75.3 eV              | 26.9%   | 76.4 eV          | 21.8%   |

**Table S4** Structural parameters extracted from the EXAFS fitting of PtZn-CoNC.

| Sample                 | Path   | N       | R (Å)     | $\sigma^2$ ( $\times 10^{-3}$ Å <sup>2</sup> ) | $\Delta E_0$ (eV) | R, % |
|------------------------|--------|---------|-----------|------------------------------------------------|-------------------|------|
| Pt foil <sup>[a]</sup> | Pt-Pt1 | 12      | 2.75±0.01 | 5±1                                            | 7.6±0.3           | 0.43 |
|                        | Pt-Pt2 | 6       | 3.88±0.02 | 8±2                                            |                   |      |
| PtZn <sup>[b]</sup>    | Pt-O   | 0.6±0.2 | 1.86±0.06 | 2±1                                            | -3.0±2.3          | 0.77 |
|                        | Pt-Zn  | 2.6±0.6 | 2.56±0.02 | 2±1                                            |                   |      |
|                        | Pt-Pt  | 4.1±1.0 | 2.61±0.03 | 4±1                                            |                   |      |

[a]:  $k$  range: 3-14.3 (Å<sup>-1</sup>);  $R$  range: 1-3.6 Å; [b]:  $k$  range: 3-12 (Å<sup>-1</sup>);  $R$  range: 1-3.2 Å;  $S_0^2 = 0.83$ ,  $S_0^2$  was determined from Pt foil. The bold numbers were set as fixed coordination numbers.

**Table S5** Comparison of the H<sub>2</sub>-O<sub>2</sub> fuel cell performance for recently reported Pt alloy electrocatalysts.

| Catalyst       | Cathode Loading (mg <sub>Pt</sub> cm <sup>-2</sup> ) | Peak Power Density (mW cm <sup>-2</sup> ) | Peak Power Density (W mg <sub>Pt</sub> <sup>-1</sup> ) | MA <sup>a</sup> (A mg <sub>Pt</sub> <sup>-1</sup> ) | References       |
|----------------|------------------------------------------------------|-------------------------------------------|--------------------------------------------------------|-----------------------------------------------------|------------------|
| PtZn-CoNC      | <b>0.05</b>                                          | <b>776</b>                                | <b>15.5</b>                                            | <b>14.60<sup>b</sup></b>                            | <b>This work</b> |
| PtCo@NGNS      | 0.1                                                  | 860                                       | 8.6                                                    | N/A                                                 | [4]              |
| Pt1Co1-MC@Pt/C | 0.2                                                  | 2300                                      | 11.5                                                   | 0.46                                                | [5]              |
| PtCo/Co-N-C    | 0.05                                                 | 700                                       | 12.0                                                   | 10.52 <sup>c</sup>                                  | [6]              |
| PtCoNi@NCNTs   | 0.066                                                | 700                                       | 10.2                                                   | 8.11 <sup>b</sup>                                   | [7]              |
| PtA@FeSA-N-C   | 0.13                                                 | 1.31                                      | 10.1                                                   | 0.45                                                | [8]              |
| PtNiCo/NC      | 0.12                                                 | 1070                                      | 9.0                                                    | N/A                                                 | [9]              |
| oh-PtNi(Mo)/C  | 0.1                                                  | 1170                                      | 11.7                                                   | 0.45                                                | [10]             |

MA<sup>a</sup>: Single cell mass activity based on the cathodic Pt-loading at a voltage of 0.9 V, MA<sup>b</sup>: at a voltage of 0.7 V and MA<sup>c</sup>: at a voltage of 0.6 V.

N/A: not applicable

**Table S6** Comparison of the ORR performance for recently reported Pt electrocatalysts.

| Catalyst                     | $E_{1/2}^a$<br>(V) | MA <sup>b</sup><br>(A mg <sub>Pt</sub> <sup>-1</sup> )<br>at 0.9 V | Loss of $E_{1/2}$<br>(mV) after<br>ADTs <sup>c</sup> | Loss of MA<br>after ADTs<br>(%) | References       |
|------------------------------|--------------------|--------------------------------------------------------------------|------------------------------------------------------|---------------------------------|------------------|
| <b>PtZn-CoNC</b>             | <b>0.910</b>       | <b>0.44</b>                                                        | <b>5 (30k)</b>                                       | <b>12.8<br/>(30k)</b>           | <b>This work</b> |
| Pt1Co1-<br>IMC@Pt/C-2.5      | N/A <sup>d</sup>   | 0.53                                                               | 10 (30k)                                             | 23.4<br>(30k)                   | [5]              |
| O-PtCo <sub>3</sub><br>@HNCS | 0.909              | 0.54                                                               | 10 (20k)                                             | 7.4<br>(20k)                    | [11]             |
| PtNi <sub>3</sub> @OMC-A     | 0.907              | 2.11<br>(0.85 V)                                                   | 10 (10k)                                             | 20.8<br>(10k)                   | [12]             |
| Pt-Co ND-NF                  | 0.95               | 0.939                                                              | 18 (5k)                                              | 39.7<br>(5k)                    | [13]             |
| Pt/ZnFe-N-C                  | 0.790              | 0.20<br>(0.85 V)                                                   | 1 (2k)                                               | 11.3<br>(2k)                    | [14]             |
| PtCo/Zn <sub>11</sub> Co     | 0.922              | 0.46                                                               | N/A                                                  | ~20<br>(60k)                    | [15]             |
| O-Pt-Fe@NC/C                 | N/A                | 0.53                                                               | 4 (10k)                                              | 14.1<br>(10k)                   | [16]             |
| Pt-Co NF                     | N/A                | 0.4<br>(0.95 V)                                                    | N/A                                                  | 15<br>(5k)                      | [17]             |
| 10%-PtZn@NC-<br>800          | 0.912              | 0.283                                                              | 1 (5k)                                               | N/A                             | [18]             |

$E_{1/2}^a$ : half-wave potential;

MA<sup>b</sup>: mass activity;

ADTs<sup>c</sup>: accelerated durability tests

N/A<sup>d</sup>: not applicable.

## Reference

1. G. Kresse and J. Hafner, *Phys. Rev. B*, 1993, **47**, 558–561.
2. G. Kresse and J. Furthmüller, *Comput. Mater. Sci.*, 1996, **6**, 15–50.
3. B. Hammer, L. B. Hansen and J. K. Nořrskov, *Phys. Rev. B* 1999, **59**, 7413–7421.
4. S. Zaman, Y. Q. Su, C. L. Dong, R. Qi, L. Huang, Y. Qin, Y. C. Huang, F. M. Li, B. You, W. Guo, Q. Li, S. Ding and B. Y. Xia, *Angew. Chem. Int. Ed.*, 2022, **61**, e202115835.
5. Q. Cheng, S. Yang, C. Fu, L. Zou, Z. Zou, Z. Jiang, J. Zhang and H. Yang, *Energy Environ. Sci.*, 2022, **15**, 278–286.
6. P. Guo, Y. Xia, B. Liu, M. Ma, L. Shen, Y. Dai, Z. Zhang, Z. Zhao, Y. Zhang, L. Zhao and Z. Wang, *ACS Appl Mater Interfaces*, 2022, **14**, 53819–53827.
7. S. Zaman, X. Tian, Y.-Q. Su, W. Cai, Y. Yan, R. Qi, A. I. Douka, S. Chen, B. You, H. Liu, S. Ding, X. Guo and B. Y. Xia, *Sci. Bull.*, 2021, **66**, 2207–2216.
8. X. Ao, W. Zhang, B. Zhao, Y. Ding, G. Nam, L. Soule, A. Abdelhafiz, C. Wang and M. Liu, *Energy Environ. Sci.*, 2020, **13**, 3032–3040.
9. S. Hanif, X. Shi, N. Iqbal, T. Noor, R. Anwar and A. M. Kannan, *Appl. Catal. B: Environ.*, 2019, **258**, 117947.
10. F. Dionigi, C. C. Weber, M. Primbs, M. Gocyla, A. M. Bonastre, C. Spori, H. Schmiebs, E. Hornberger, S. Kuhl, J. Drnec, M. Heggen, J. Sharman, R. E. Dunin-Borkowski and P. Strasser, *Nano Lett.*, 2019, **19**, 6876–6885.
11. Y. Hu, X. Guo, T. Shen, Y. Zhu and D. Wang, *ACS Catal.*, 2022, **12**, 5380–5387.
12. K. Wang, Y. Wang, S. Geng, Y. Wang and S. Song, *Adv. Funct. Mater.*, 2022, **32**, 2113399.
13. X. Zhu, L. Huang, M. Wei, P. Tsiakaras and P. K. Shen, *Appl. Catal. B: Environ.*, 2021, **281**, 119460.
14. J. Li, Q. Zhou, M. Yue, S. Chen, J. Deng, X. Ping, Y. Li, J. Li, Q. Liao, M. Shao and Z. Wei, *Appl. Catal. B: Environ.*, 2021, **284**, 119728.
15. Y. Xiong, Y. Yang, F. J. DiSalvo and H. D. Abruna, *ACS Nano*, 2020, **14**, 13069–13080.
16. Y. Hu, T. Shen, X. Zhao, J. Zhang, Y. Lu, J. Shen, S. Lu, Z. Tu, H. L. Xin and D. Wang, *Appl. Catal. B: Environ.*, 2020, **279**, 119370.
17. S. Chen, M. Li, M. Gao, J. Jin, M. A. van Spronsen, M. B. Salmeron and P. Yang, *Nano Lett.*, 2020, **20**, 1974–1979.
18. Y. Xue, H. Li, X. Ye, S. Yang, Z. Zheng, X. Han, X. Zhang, L. Chen, Z. Xie, Q. Kuang and L. Zheng, *Nano Res.*, 2019, **12**, 2490–2497.
